# Supplementary material
Source: PubMed Central journal article supplement (PMC9924612)

# Supporting Information (SI)

for

## A Bifunctional Chemical Reporter for *In Situ* Analysis of Cell Envelope Glycan Recycling in Mycobacteria

Amol Arunrao Pohane,<sup>a,†</sup> Devin J. Moore,<sup>b,†</sup> Irene Lepori,<sup>a</sup> Rebecca A. Gordon,<sup>d</sup> Temitope O. Nathan,<sup>b</sup> Dana M. Gepford,<sup>b</sup> Herbert W. Kavunja,<sup>b</sup> Benjamin M. Swarts,<sup>\*,b,c</sup> and M. Sloan Siegrist<sup>\*,a,d</sup>

<sup>a</sup>Department of Microbiology, University of Massachusetts, Amherst, MA, 01003 USA

<sup>b</sup>Department of Chemistry and Biochemistry, Central Michigan University, Mount Pleasant, MI, 48859 USA

<sup>c</sup>Biochemistry, Cell, and Molecular Biology Program, Central Michigan University, Mount Pleasant, MI, 48859 United States

<sup>d</sup>Molecular and Cellular Biology Graduate Program, University of Massachusetts, Amherst, MA, 01003 USA

<sup>†</sup>These authors contributed equally to this work.

\*Corresponding authors: siegrist@umass.edu; ben.swarts@cmich.edu

## SI Table of Contents

|                                                                |    |
|----------------------------------------------------------------|----|
| <b>I. Supplementary Figures</b>                                | S3 |
| Figure S1. Ebselen decreases alkyne signal from O-AzAlkTMM     | S3 |
| Figure S2. Images of O-AzAlkTMM-labeled <i>M. tuberculosis</i> | S4 |
| <b>II. NMR Spectra</b>                                         | S5 |

## I. Supplementary Figures

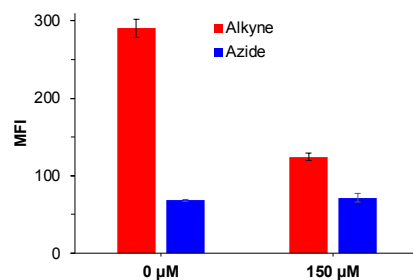

**Figure S1.** Inhibition of antigen 85 by the cysteine-reactive compound ebselen decreases alkyne signal from O-AzAlkTMM (**3**). Wild-type *M. smegmatis* was pre-incubated with +/-150 μM ebselen for 10 minutes and labeled as in Fig. 2. MFI, median fluorescence intensity.

## O-AzAlkTMM

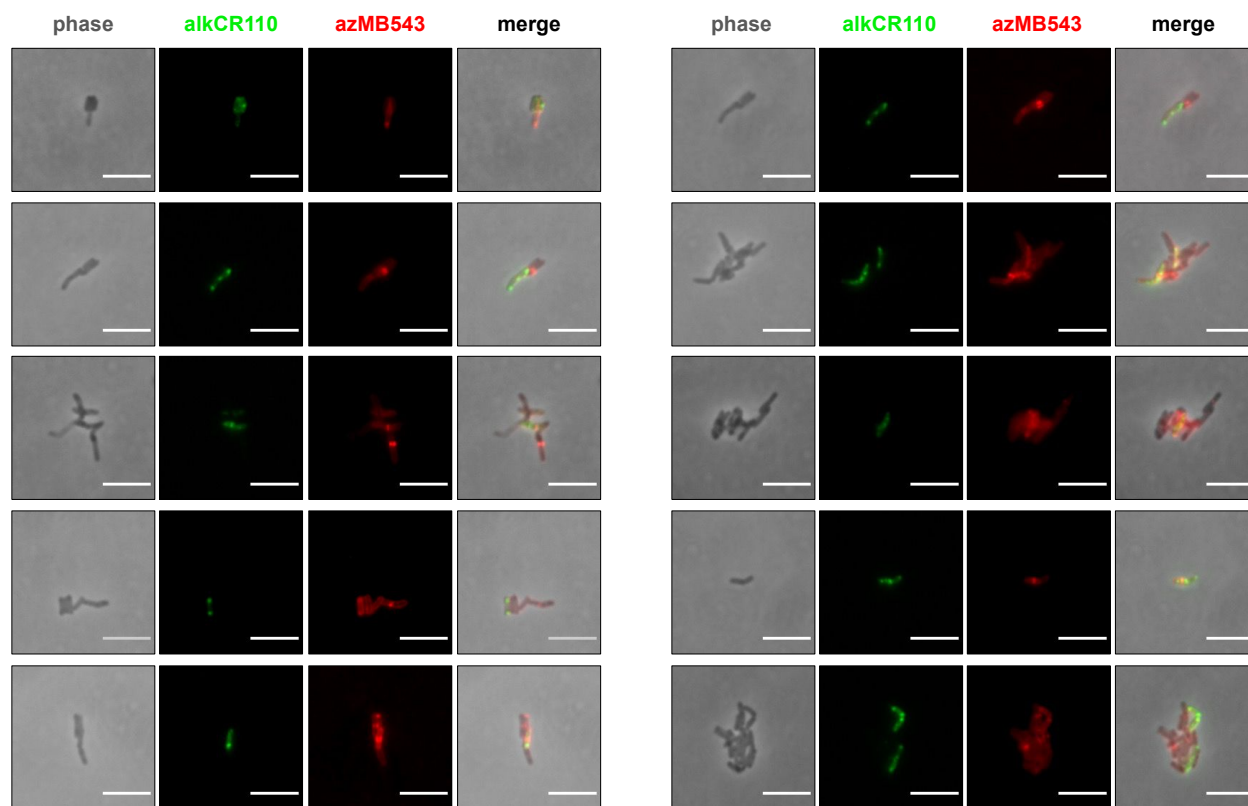

**Figure S2.** Additional images of  $\Delta leuD \Delta panCD$  *M. tuberculosis* labeled with O-AzAlkTMM and successive rounds of CuAAC as in Figure 3B. Scale bars, 5  $\mu$ M.

## II. NMR Spectra

### Compound 4 $^1\text{H}$ NMR ( $\text{CDCl}_3$ , 500 MHz)

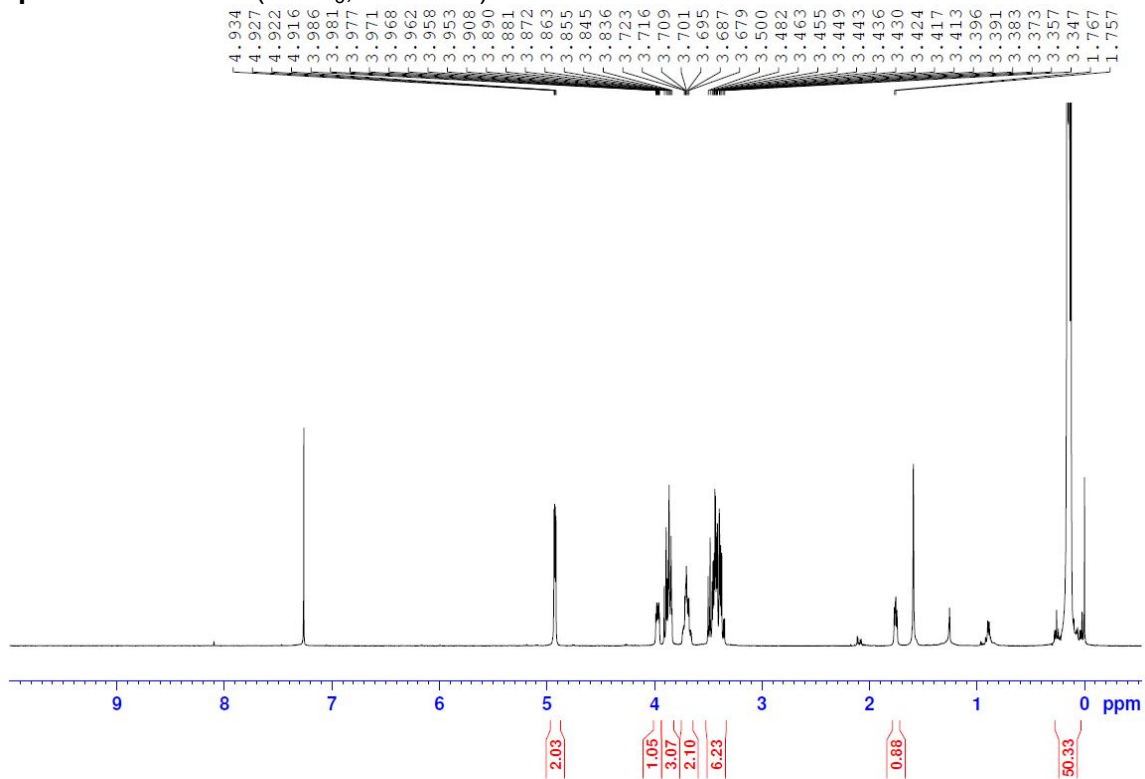

### Compound 4 $^{13}\text{C}$ NMR ( $\text{CDCl}_3$ , 125 MHz)

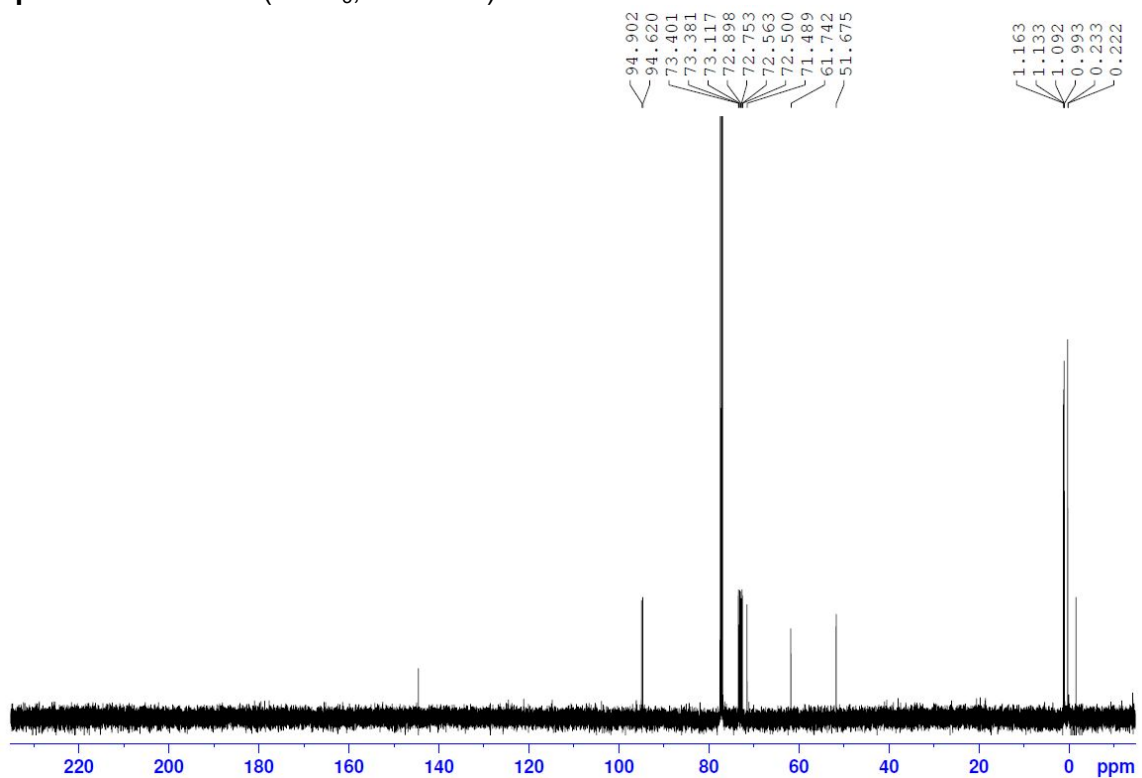

Compound 5 <sup>1</sup>H NMR (CDCl<sub>3</sub>, 500 MHz)

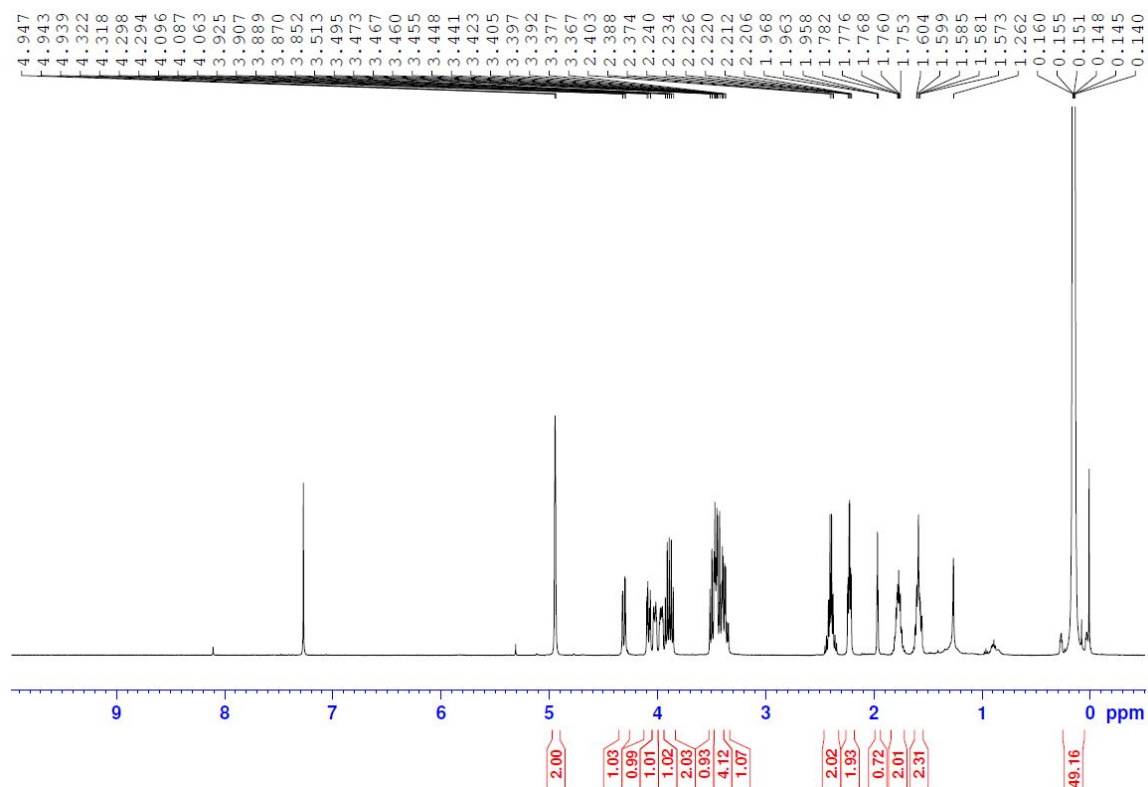

Compound 5 <sup>13</sup>C NMR (CDCl<sub>3</sub>, 125 MHz)

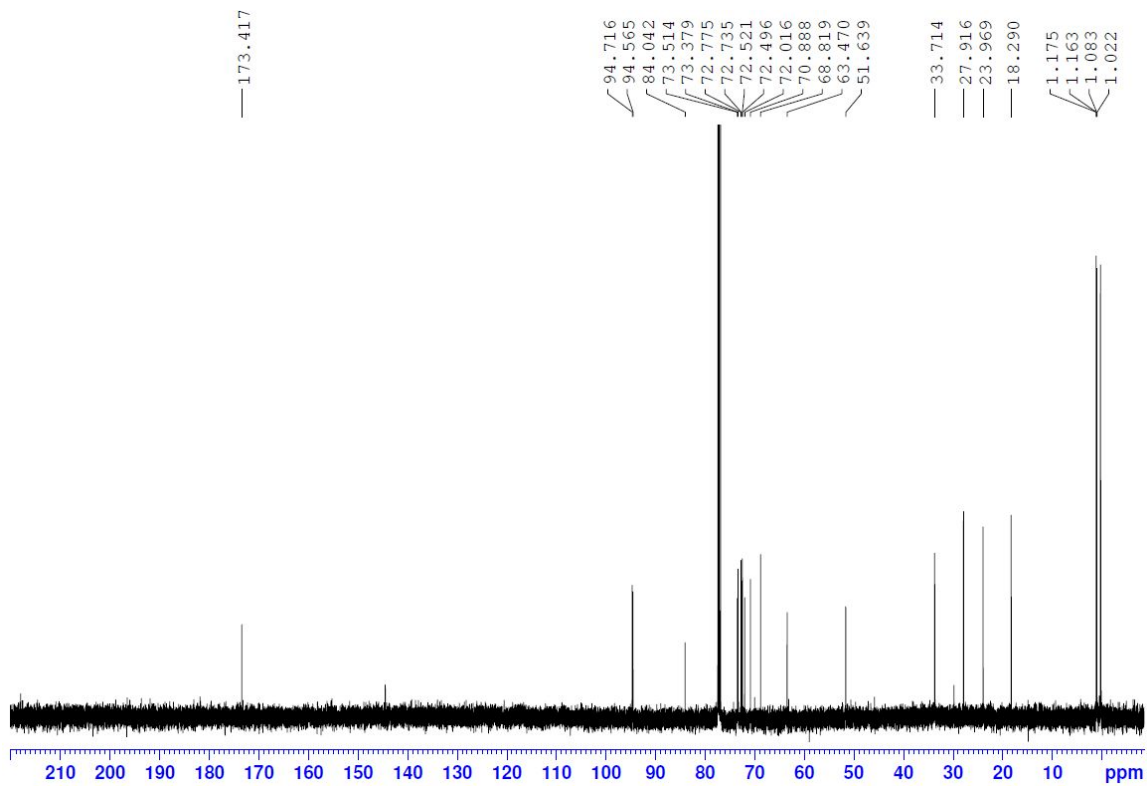

**O-AzAlkTMM (3) <sup>1</sup>H NMR (D<sub>2</sub>O, 500 MHz)**

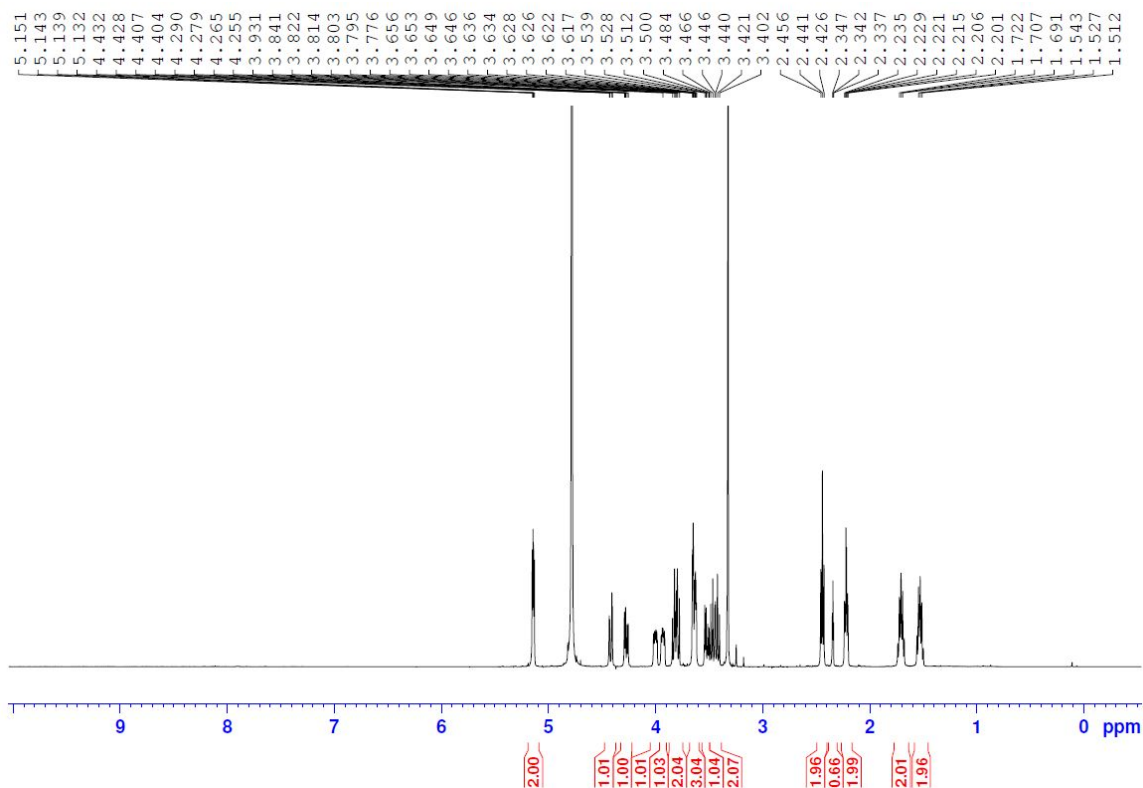

**O-AzAlkTMM (3) <sup>13</sup>C NMR (D<sub>2</sub>O, 125 MHz)**

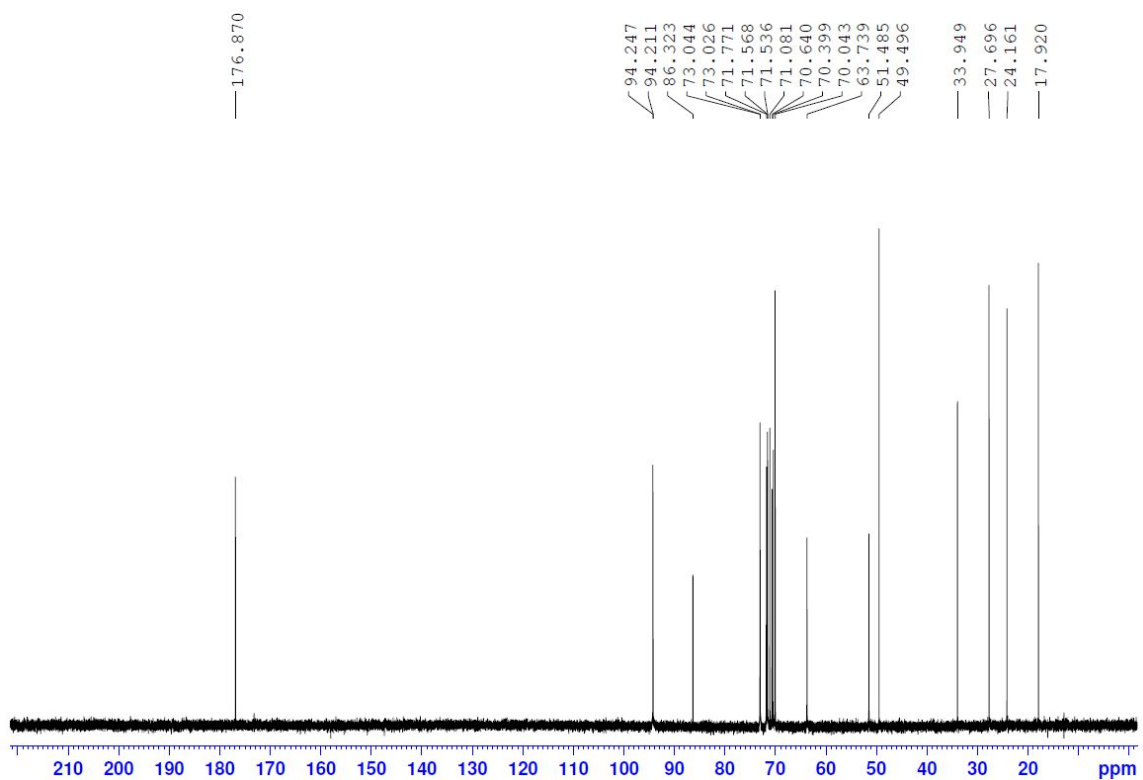

Supplement: NIHMS1859209-supplement-Accepted_SI.pdf [file NIHMS1859209-supplement-Accepted_SI.pdf]
